# Supplementary material for: Commensal oral microbiota impacts ulcerative oral mucositis clinical course in allogeneic stem cell transplant recipients
Source: PubMed Central journal article supplement (PMC9584897; doi:10.1038/s41598-022-21775-3), 2022-10-20
Supplement: 41598_2022_21775_MOESM1_ESM.pdf [file 41598_2022_21775_MOESM1_ESM.pdf]

**SUPPLEMENTAL MATERIAL**

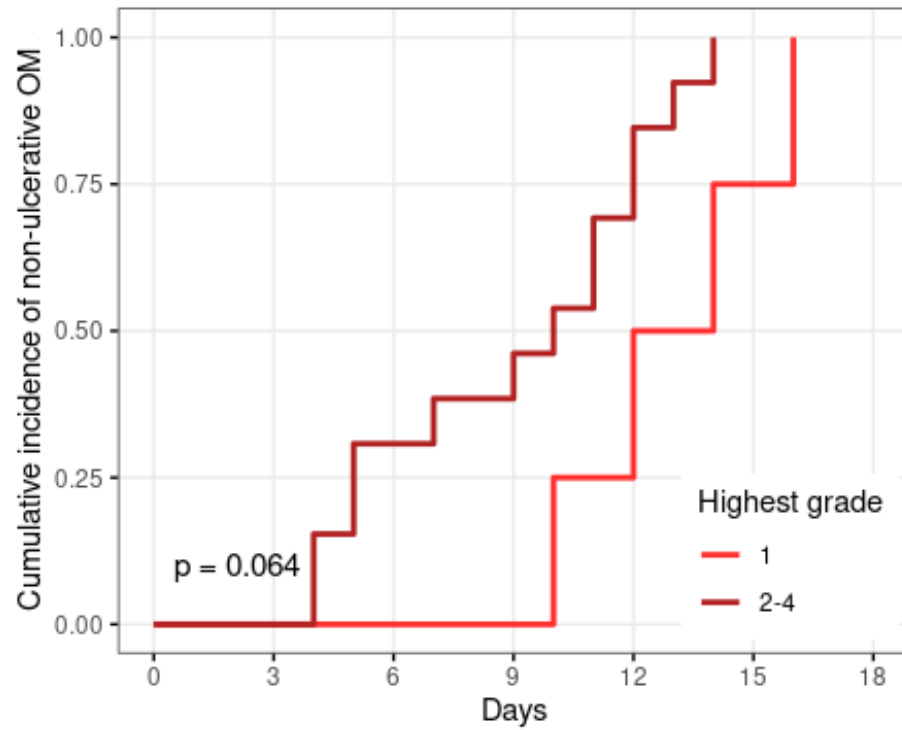

**Figure S1: Cumulative incidence curves of non-ulcerative OM with patients stratified by the highest OM grade during OM clinical course (1/2-4).** Statistical significance was evaluated by the log-rank test, with P-value indicated.

|                                              | <b>n = 30</b> |
|----------------------------------------------|---------------|
| <b>Age in years (median, range)</b>          | 50 (19-73)    |
| <b>Sex (male)</b>                            | 16 (53%)      |
| <b>Oral Mucositis Grades (WHO)</b>           |               |
| Grade 0                                      | 12 (40%)      |
| Grade I                                      | 5 (17%)       |
| Grade II                                     | 4 (13%)       |
| Grade III                                    | 6 (20%)       |
| Grade IV                                     | 3 (10%)       |
| <b>Conditioning Intensity</b>                |               |
| Reduced Intensity                            | 18 (60%)      |
| <b>Total Body Irradiation</b>                | 11 (37%)      |
| <b>Alkylating Agents</b>                     |               |
| Busulfan                                     | 15 (50%)      |
| Cyclophosphamide                             | 10 (33%)      |
| Melphalan                                    | 4 (13%)       |
| Bendamustine                                 | 1 (3%)        |
| Treosulfan                                   | 1 (3%)        |
| <b>Graft Source</b>                          |               |
| Bone Marrow                                  | 10 (33%)      |
| Peripheal Blood                              | 20 (67%)      |
| <b>Underlying Disease</b>                    |               |
| Acute Myeloid Leukemia                       | 18 (60%)      |
| Acute Lymbhoblastic Leukemia                 | 7 (23%)       |
| Non-hodgkin Lymphoma                         | 5 (17%)       |
| Myelodysplastic Syndrome                     | 4 (13%)       |
| Chronic Lymphocytic Leukemia                 | 1 (3%)        |
| Chronic Myeloid Leukemia                     | 2 (3%)        |
| Multiple Myeloma                             | 3 (3%)        |
| <b>Graft-versus-Host Disease Prophylaxis</b> |               |
| Mycophenolate+Cyclosporin A                  | 11 (37%)      |
| Methotrexate+Cyscclorin A                    | 10 (33%)      |
| Mycophenolate+Cyclosporin A+Cyclophosphamide | 9 (30%)       |

**Table S1: Clinical characteristics of study patients.**

| Genus                                                                                                                          | log(FoldChange) | P-value | Adjusted P-value | Differentially abundant |
|--------------------------------------------------------------------------------------------------------------------------------|-----------------|---------|------------------|-------------------------|
| D_0_Bacteria;D_1_Actinobacteria;D_2_Actinobacteria;D_3_Actinomycetales;D_4_Actinomycetaceae;D_5_Actinomyces                    | -0,59           | 0,46    | 1                | No                      |
| D_0_Bacteria;D_1_Actinobacteria;D_2_Actinobacteria;D_3_Actinomycetales;D_4_Actinomycetaceae;D_5_F0332                          | 0,79            | 0,00    | 0                | No                      |
| D_0_Bacteria;D_1_Actinobacteria;D_2_Actinobacteria;D_3_Bifidobacteriales;D_4_Bifidobacteriaceae;D_5_Bifidobacterium            | -0,85           | 0,00    | 0                | No                      |
| D_0_Bacteria;D_1_Actinobacteria;D_2_Actinobacteria;D_3_Bifidobacteriales;D_4_Bifidobacteriaceae;                               | 0,59            | 0,00    | 0                | No                      |
| D_0_Bacteria;D_1_Actinobacteria;D_2_Actinobacteria;D_3_Micrococcales;D_4_Micrococcaceae;D_5_Rothia                             | -0,24           | 0,76    | 1                | No                      |
| D_0_Bacteria;D_1_Actinobacteria;D_2_Coriobacterii;D_3_Coriobacteriales;D_4_Atopobiaceae;D_5_Atopobium                          | -0,29           | 0,74    | 1                | No                      |
| D_0_Bacteria;D_1_Bacteroidetes;D_2_Bacteroidia;D_3_Bacteroidales;D_4_Porphyrionadaceae;D_5_Porphyrionas                        | -0,70           | 0,54    | 1                | No                      |
| D_0_Bacteria;D_1_Bacteroidetes;D_2_Bacteroidia;D_3_Bacteroidales;D_4_Prevotellaceae;D_5_Alloprevotella                         | -0,07           | 0,95    | 1                | No                      |
| D_0_Bacteria;D_1_Bacteroidetes;D_2_Bacteroidia;D_3_Bacteroidales;D_4_Prevotellaceae;D_5_Prevotella                             | 0,85            | 0,28    | 1                | No                      |
| D_0_Bacteria;D_1_Bacteroidetes;D_2_Bacteroidia;D_3_Bacteroidales;D_4_Prevotellaceae;D_5_Prevotella 2                           | -0,33           | 0,72    | 1                | No                      |
| D_0_Bacteria;D_1_Bacteroidetes;D_2_Bacteroidia;D_3_Bacteroidales;D_4_Prevotellaceae;D_5_Prevotella 6                           | 0,51            | 0,62    | 1                | No                      |
| D_0_Bacteria;D_1_Bacteroidetes;D_2_Bacteroidia;D_3_Bacteroidales;D_4_Prevotellaceae;D_5_Prevotella 7                           | -0,02           | 0,98    | 1                | No                      |
| D_0_Bacteria;D_1_Bacteroidetes;D_2_Bacteroidia;D_3_Bacteroidales;D_4_Tannerellaceae;D_5_Tannerella                             | 1,19            | 0,00    | 0                | No                      |
| D_0_Bacteria;D_1_Bacteroidetes;D_2_Bacteroidia;D_3_Flavobacteriales;D_4_Flavobacteriaceae;D_5_Capnocytophaga                   | 1,00            | 0,33    | 1                | No                      |
| D_0_Bacteria;D_1_Bacteroidetes;D_2_Bacteroidia;D_3_Flavobacteriales;D_4_Weeksellaceae;D_5_Bergeyella                           | 0,56            | 0,60    | 1                | No                      |
| D_0_Bacteria;D_1_Epsilonbacteraeota;D_2_Campylobacteria;D_3_Campylobacteriales;D_4_Campylobacteraceae;D_5_Campylobacter        | 0,38            | 0,60    | 1                | No                      |
| D_0_Bacteria;D_1_Firmicutes;D_2_Bacilli;D_3_Bacillales;D_4_Family XI;D_5_Gemella                                               | -0,31           | 0,75    | 1                | No                      |
| D_0_Bacteria;D_1_Firmicutes;D_2_Bacilli;D_3_Lactobacillales;D_4_Carnobacteriaceae;D_5_Granulicatella                           | -0,95           | 0,37    | 1                | No                      |
| D_0_Bacteria;D_1_Firmicutes;D_2_Bacilli;D_3_Lactobacillales;D_4_Lactobacillaceae;D_5_Lactobacillus                             | -0,17           | 0,85    | 1                | No                      |
| D_0_Bacteria;D_1_Firmicutes;D_2_Bacilli;D_3_Lactobacillales;D_4_Streptococcaceae;D_5_Lactococcus                               | 1,38            | 0,00    | 0                | No                      |
| D_0_Bacteria;D_1_Firmicutes;D_2_Bacilli;D_3_Lactobacillales;D_4_Streptococcaceae;D_5_Streptococcus                             | -0,70           | 0,40    | 1                | No                      |
| D_0_Bacteria;D_1_Firmicutes;D_2_Clostridia;D_3_Clostridiales;D_4_Family XI;D_5_Parvimonas                                      | -0,71           | 0,31    | 1                | No                      |
| D_0_Bacteria;D_1_Firmicutes;D_2_Clostridia;D_3_Clostridiales;D_4_Family XIII;D_5_Mogibacterium                                 | 0,96            | 0,00    | 0                | No                      |
| D_0_Bacteria;D_1_Firmicutes;D_2_Clostridia;D_3_Clostridiales;D_4_Family XIII;D_5_[Eubacterium] nodatum group                   | 0,16            | 0,83    | 1                | No                      |
| D_0_Bacteria;D_1_Firmicutes;D_2_Clostridia;D_3_Clostridiales;D_4_Lachnospiraceae;D_5_Butyrvibrio 2                             | -0,21           | 0,77    | 1                | No                      |
| D_0_Bacteria;D_1_Firmicutes;D_2_Clostridia;D_3_Clostridiales;D_4_Lachnospiraceae;D_5_Catonella                                 | 0,33            | 0,66    | 1                | No                      |
| D_0_Bacteria;D_1_Firmicutes;D_2_Clostridia;D_3_Clostridiales;D_4_Lachnospiraceae;D_5_Lachnoanaerobaculum                       | 1,09            | 0,21    | 1                | No                      |
| D_0_Bacteria;D_1_Firmicutes;D_2_Clostridia;D_3_Clostridiales;D_4_Lachnospiraceae;D_5_Oribacterium                              | 0,55            | 0,42    | 1                | No                      |
| D_0_Bacteria;D_1_Firmicutes;D_2_Clostridia;D_3_Clostridiales;D_4_Lachnospiraceae;D_5_Stomatobaculum                            | 0,46            | 0,57    | 1                | No                      |
| D_0_Bacteria;D_1_Firmicutes;D_2_Clostridia;D_3_Clostridiales;D_4_Lachnospiraceae;                                              | 0,06            | 0,95    | 1                | No                      |
| D_0_Bacteria;D_1_Firmicutes;D_2_Clostridia;D_3_Clostridiales;D_4_Peptostreptococcaceae;D_5_Peptostreptococcus                  | 0,14            | 0,81    | 1                | No                      |
| D_0_Bacteria;D_1_Firmicutes;D_2_Clostridia;D_3_Clostridiales;D_4_Ruminococcaceae;D_5_Ruminococcaceae UCG-014                   | -1,04           | 0,27    | 1                | No                      |
| D_0_Bacteria;D_1_Firmicutes;D_2_Erysipelotrichia;D_3_Erysipelotrichales;D_4_Erysipelotrichaceae;D_5_Solobacterium              | 0,28            | 0,69    | 1                | No                      |
| D_0_Bacteria;D_1_Firmicutes;D_2_Negativicutes;D_3_Selenomonadales;D_4_Veillonellaceae;D_5_Dialister                            | 0,67            | 0,00    | 0                | No                      |
| D_0_Bacteria;D_1_Firmicutes;D_2_Negativicutes;D_3_Selenomonadales;D_4_Veillonellaceae;D_5_Megasphaera                          | -0,29           | 0,78    | 1                | No                      |
| D_0_Bacteria;D_1_Firmicutes;D_2_Negativicutes;D_3_Selenomonadales;D_4_Veillonellaceae;D_5_Selenomonas                          | 0,16            | 0,84    | 1                | No                      |
| D_0_Bacteria;D_1_Firmicutes;D_2_Negativicutes;D_3_Selenomonadales;D_4_Veillonellaceae;D_5_Selenomonas 3                        | 0,71            | 0,37    | 1                | No                      |
| D_0_Bacteria;D_1_Firmicutes;D_2_Negativicutes;D_3_Selenomonadales;D_4_Veillonellaceae;D_5_Veillonella                          | -0,26           | 0,71    | 1                | No                      |
| D_0_Bacteria;D_1_Fusobacteria;D_2_Fusobacterii;D_3_Fusobacteriales;D_4_Fusobacteriaceae;D_5_Fusobacterium                      | 0,19            | 0,83    | 1                | No                      |
| D_0_Bacteria;D_1_Fusobacteria;D_2_Fusobacterii;D_3_Fusobacteriales;D_4_Leptotrichiaceae;D_5_Leptotrichia                       | 0,25            | 0,76    | 1                | No                      |
| D_0_Bacteria;D_1_Patescibacteria;D_2_Saccharimonadia;D_3_Saccharimonadales;D_4_Saccharimonadaceae;D_5_Candidatus Saccharimonas | 1,76            | 0,00    | 0                | No                      |
| D_0_Bacteria;D_1_Patescibacteria;D_2_Saccharimonadia;D_3_Saccharimonadales;D_4_Saccharimonadaceae;D_5_uncultured bacterium     | -0,65           | 0,53    | 1                | No                      |
| D_0_Bacteria;D_1_Patescibacteria;D_2_Saccharimonadia;D_3_Saccharimonadales;D_4_uncultured bacterium;D_5_uncultured bacterium   | 0,89            | 0,00    | 0                | No                      |
| D_0_Bacteria;D_1_Proteobacteria;D_2_Gammaproteobacteria;D_3_Betaproteobacteriales;D_4_Burkholderiaceae;D_5_Lautropia           | 0,60            | 0,42    | 1                | No                      |
| D_0_Bacteria;D_1_Proteobacteria;D_2_Gammaproteobacteria;D_3_Betaproteobacteriales;D_4_Neisseriaceae;D_5_Kingella               | 1,10            | 0,00    | 0                | No                      |
| D_0_Bacteria;D_1_Proteobacteria;D_2_Gammaproteobacteria;D_3_Betaproteobacteriales;D_4_Neisseriaceae;D_5_Neisseria              | -0,64           | 0,68    | 1                | No                      |
| D_0_Bacteria;D_1_Proteobacteria;D_2_Gammaproteobacteria;D_3_Cardiobacteriales;D_4_Cardiobacteriaceae;D_5_Cardiobacterium       | -0,48           | 0,40    | 1                | No                      |
| D_0_Bacteria;D_1_Proteobacteria;D_2_Gammaproteobacteria;D_3_Pasteurellales;D_4_Pasteurellaceae;D_5_Haemophilus                 | -0,59           | 0,61    | 1                | No                      |
| D_0_Bacteria;D_1_Spirochaetes;D_2_Spirochaetia;D_3_Spirochaetales;D_4_Spirochaetaceae;D_5_Treponema 2                          | -0,33           | 0,64    | 1                | No                      |

**Table S2: Differential abundance analysis between oral mucositis (OM) and OM-free patients at preconditioning.** The analysis was performed with ANCOM-BC at genus level. No genera passed the log(FoldChange) and adjusted P-value cutoffs to be considered as significantly differentially abundant between groups.

| Genus                                                                                                                      | P-value | HR   | HR (2.5 percentile) | HR (97.5 percentile) | % Group1 | % Group0 |
|----------------------------------------------------------------------------------------------------------------------------|---------|------|---------------------|----------------------|----------|----------|
| D_0_Bacteria.D_1_Actinobacteria.D_2_Actinobacteria.D_3_Actinomycetales.D_4_Actinomycetales.D_5_Actinomyces                 | 0,56    | 1,38 | 0,46                | 4,12                 | 50       | 40       |
| D_0_Bacteria.D_1_Actinobacteria.D_2_Actinobacteria.D_3_Micrococcales.D_4_Micrococaceae.D_5_Rothia                          | 0,23    | 0,51 | 0,17                | 1,55                 | 36       | 53       |
| D_0_Bacteria.D_1_Actinobacteria.D_2_Coriobacterii.D_3_Coriobacteriales.D_4_Atopobiaceae.D_5_Atopobium                      | 0,53    | 1,41 | 0,47                | 4,22                 | 50       | 40       |
| D_0_Bacteria.D_1_Bacteroidetes.D_2_Bacteroidia.D_3_Bacteroidales.D_4_Porphyrromonadaceae.D_5_Porphyrromonas                | 0,95    | 1,04 | 0,35                | 3,08                 | 43       | 47       |
| D_0_Bacteria.D_1_Bacteroidetes.D_2_Bacteroidia.D_3_Bacteroidales.D_4_Prevotellaceae.D_5_Alloprevotella                     | 0,48    | 0,67 | 0,22                | 2,05                 | 36       | 53       |
| D_0_Bacteria.D_1_Bacteroidetes.D_2_Bacteroidia.D_3_Bacteroidales.D_4_Prevotellaceae.D_5_Prevotella                         | 0,56    | 1,38 | 0,46                | 4,13                 | 50       | 40       |
| D_0_Bacteria.D_1_Bacteroidetes.D_2_Bacteroidia.D_3_Bacteroidales.D_4_Prevotellaceae.D_5_Prevotella.6                       | 0,53    | 1,41 | 0,47                | 4,22                 | 50       | 40       |
| D_0_Bacteria.D_1_Bacteroidetes.D_2_Bacteroidia.D_3_Bacteroidales.D_4_Prevotellaceae.D_5_Prevotella.7                       | 0,93    | 0,95 | 0,32                | 2,83                 | 43       | 47       |
| D_0_Bacteria.D_1_Bacteroidetes.D_2_Bacteroidia.D_3_Flavobacteriales.D_4_Flavobacteriaceae.D_5_Capnocytophaga               | 0,27    | 1,85 | 0,6                 | 5,68                 | 57       | 33       |
| D_0_Bacteria.D_1_Bacteroidetes.D_2_Bacteroidia.D_3_Flavobacteriales.D_4_Weeksellaceae.D_5_Bergeyella                       | 0,59    | 1,35 | 0,45                | 4,02                 | 50       | 40       |
| D_0_Bacteria.D_1_Epsilonbacteraeota.D_2_Campylobacteria.D_3_Campylobacteriales.D_4_Campylobacteraceae.D_5_Campylobacter    | 0,46    | 1,51 | 0,51                | 4,5                  | 50       | 40       |
| D_0_Bacteria.D_1_Firmicutes.D_2_Bacilli.D_3_Bacillales.D_4_Family.XI.D_5_Gemella                                           | 0,27    | 0,54 | 0,18                | 1,64                 | 36       | 53       |
| D_0_Bacteria.D_1_Firmicutes.D_2_Bacilli.D_3_Lactobacillales.D_4_Carnobacteriaceae.D_5_Granulicatella                       | 0,08    | 0,36 | 0,11                | 1,17                 | 29       | 60       |
| D_0_Bacteria.D_1_Firmicutes.D_2_Bacilli.D_3_Lactobacillales.D_4_Lactobacillaceae.D_5_Lactobacillus                         | 0,21    | 2,01 | 0,65                | 6,16                 | 57       | 33       |
| D_0_Bacteria.D_1_Firmicutes.D_2_Bacilli.D_3_Lactobacillales.D_4_Streptococcaceae.D_5_Streptococcus                         | 0,21    | 0,49 | 0,16                | 1,52                 | 36       | 53       |
| D_0_Bacteria.D_1_Firmicutes.D_2_Clostridia.D_3_Clostridiales.D_4_Lachnospiraceae.D_5_Catonella                             | 0,74    | 1,2  | 0,4                 | 3,58                 | 50       | 40       |
| D_0_Bacteria.D_1_Firmicutes.D_2_Clostridia.D_3_Clostridiales.D_4_Lachnospiraceae.D_5_Lachnoanaerobaculum                   | 0,61    | 1,32 | 0,44                | 3,95                 | 50       | 40       |
| D_0_Bacteria.D_1_Firmicutes.D_2_Clostridia.D_3_Clostridiales.D_4_Lachnospiraceae.D_5_Oribacterium                          | 0,69    | 1,25 | 0,42                | 3,72                 | 50       | 40       |
| D_0_Bacteria.D_1_Firmicutes.D_2_Clostridia.D_3_Clostridiales.D_4_Lachnospiraceae.D_5_Stomatobaculum                        | 0,74    | 1,2  | 0,4                 | 3,58                 | 50       | 40       |
| D_0_Bacteria.D_1_Firmicutes.D_2_Erysipelotrichia.D_3_Erysipelotrichales.D_4_Erysipelotrichaceae.D_5_Solobacterium          | 0,89    | 0,93 | 0,31                | 2,77                 | 43       | 47       |
| D_0_Bacteria.D_1_Firmicutes.D_2_Negativicutes.D_3_Selenomonadales.D_4_Veillonellaceae.D_5_Megasphaera                      | 0,39    | 0,62 | 0,2                 | 1,88                 | 36       | 53       |
| D_0_Bacteria.D_1_Firmicutes.D_2_Negativicutes.D_3_Selenomonadales.D_4_Veillonellaceae.D_5_Selenomonas.3                    | 0,50    | 1,46 | 0,49                | 4,36                 | 50       | 40       |
| D_0_Bacteria.D_1_Firmicutes.D_2_Negativicutes.D_3_Selenomonadales.D_4_Veillonellaceae.D_5_Veillonella                      | 0,55    | 1,4  | 0,47                | 4,16                 | 50       | 40       |
| D_0_Bacteria.D_1_Fusobacteria.D_2_Fusobacterii.D_3_Fusobacteriales.D_4_Fusobacteriaceae.D_5_Fusobacterium                  | 0,85    | 0,9  | 0,3                 | 2,67                 | 43       | 47       |
| D_0_Bacteria.D_1_Fusobacteria.D_2_Fusobacterii.D_3_Fusobacteriales.D_4_Leptotrichiaceae.D_5_Leptotrichia                   | 0,86    | 0,91 | 0,31                | 2,71                 | 43       | 47       |
| D_0_Bacteria.D_1_Patescibacteria.D_2_Saccharimonadia.D_3_Saccharimonadales.D_4_Saccharimonadaceae.D_5_uncultured.bacterium | 0,41    | 0,63 | 0,21                | 1,93                 | 36       | 53       |
| D_0_Bacteria.D_1_Proteobacteria.D_2_Gammaproteobacteria.D_3_Betaproteobacteriales.D_4_Neisseriaceae.D_5_Neisseria          | 0,30    | 0,56 | 0,18                | 1,7                  | 36       | 53       |
| D_0_Bacteria.D_1_Proteobacteria.D_2_Gammaproteobacteria.D_3_Pasteurellales.D_4_Pasteurellaceae.D_5_Haemophilus             | 0,42    | 0,63 | 0,21                | 1,94                 | 36       | 53       |

**Table S3: Association between genera relative abundance at preconditioning and oral mucositis (OM) risk.** Groups were stratified based on median genus relative abundance and association with the risk of OM was assessed by estimating the Cox proportional hazards between groups. HR, Hazard Ratio; % Group1, percentage of patients classified as having high genus relative abundance at preconditioning that developed OM; % Group0, percentage of patients classified as having low genus relative abundance at preconditioning that developed OM.

| Genus                                                                                                                      | P-value | Spearman rho |
|----------------------------------------------------------------------------------------------------------------------------|---------|--------------|
| D_0_Bacteria.D_1_Actinobacteria.D_2_Actinobacteria.D_3_Actinomycetales.D_4_Actinomycetaceae.D_5_Actinomyces                | 0,57    | 0,11         |
| D_0_Bacteria.D_1_Actinobacteria.D_2_Actinobacteria.D_3_Micrococcales.D_4_Micrococcaceae.D_5_Rothia                         | 0,11    | -0,30        |
| D_0_Bacteria.D_1_Actinobacteria.D_2_Coriobacteriia.D_3_Coriobacteriales.D_4_Atopobiaceae.D_5_Atopobium                     | 0,86    | -0,03        |
| D_0_Bacteria.D_1_Bacteroidetes.D_2_Bacteroidia.D_3_Bacteroidales.D_4_Porphyrimonadaceae.D_5_Porphyrimonas                  | 0,96    | 0,01         |
| D_0_Bacteria.D_1_Bacteroidetes.D_2_Bacteroidia.D_3_Bacteroidales.D_4_Prevotellaceae.D_5_Alloprevotella                     | 0,78    | 0,05         |
| D_0_Bacteria.D_1_Bacteroidetes.D_2_Bacteroidia.D_3_Bacteroidales.D_4_Prevotellaceae.D_5_Prevotella                         | 0,15    | 0,27         |
| D_0_Bacteria.D_1_Bacteroidetes.D_2_Bacteroidia.D_3_Bacteroidales.D_4_Prevotellaceae.D_5_Prevotella.6                       | 0,45    | 0,15         |
| D_0_Bacteria.D_1_Bacteroidetes.D_2_Bacteroidia.D_3_Bacteroidales.D_4_Prevotellaceae.D_5_Prevotella.7                       | 0,82    | -0,04        |
| D_0_Bacteria.D_1_Bacteroidetes.D_2_Bacteroidia.D_3_Flavobacteriales.D_4_Flavobacteriaceae.D_5_Capnocytophaga               | 0,37    | 0,17         |
| D_0_Bacteria.D_1_Bacteroidetes.D_2_Bacteroidia.D_3_Flavobacteriales.D_4_Weeksellaceae.D_5_Bergeyella                       | 0,46    | 0,14         |
| D_0_Bacteria.D_1_Epsilonbacteraeota.D_2_Campylobacteria.D_3_Campylobacteriales.D_4_Campylobacteraceae.D_5_Campylobacter    | 0,95    | -0,01        |
| D_0_Bacteria.D_1_Firmicutes.D_2_Bacilli.D_3_Bacillales.D_4_Family.XI.D_5_Gemella                                           | 0,71    | -0,07        |
| D_0_Bacteria.D_1_Firmicutes.D_2_Bacilli.D_3_Lactobacillales.D_4_Carnobacteriaceae.D_5_Granulicatella                       | 0,76    | -0,06        |
| D_0_Bacteria.D_1_Firmicutes.D_2_Bacilli.D_3_Lactobacillales.D_4_Lactobacillaceae.D_5_Lactobacillus                         | 0,95    | 0,01         |
| D_0_Bacteria.D_1_Firmicutes.D_2_Bacilli.D_3_Lactobacillales.D_4_Streptococcaceae.D_5_Streptococcus                         | 0,06    | -0,35        |
| D_0_Bacteria.D_1_Firmicutes.D_2_Clostridia.D_3_Clostridiales.D_4_Lachnospiraceae.D_5_Catonella                             | 0,64    | 0,09         |
| D_0_Bacteria.D_1_Firmicutes.D_2_Clostridia.D_3_Clostridiales.D_4_Lachnospiraceae.D_5_Lachnoanaerobaculum                   | 0,74    | 0,06         |
| D_0_Bacteria.D_1_Firmicutes.D_2_Clostridia.D_3_Clostridiales.D_4_Lachnospiraceae.D_5_Oribacterium                          | 0,61    | 0,10         |
| D_0_Bacteria.D_1_Firmicutes.D_2_Clostridia.D_3_Clostridiales.D_4_Lachnospiraceae.D_5_Stomatobaculum                        | 0,58    | 0,11         |
| D_0_Bacteria.D_1_Firmicutes.D_2_Erysipelotrichia.D_3_Erysipelotrichales.D_4_Erysipelotrichaceae.D_5_Solobacterium          | 0,25    | 0,22         |
| D_0_Bacteria.D_1_Firmicutes.D_2_Negativicutes.D_3_Selenomonadales.D_4_Veillonellaceae.D_5_Megasphaera                      | 0,73    | -0,07        |
| D_0_Bacteria.D_1_Firmicutes.D_2_Negativicutes.D_3_Selenomonadales.D_4_Veillonellaceae.D_5_Selenomonas.3                    | 0,90    | -0,03        |
| D_0_Bacteria.D_1_Firmicutes.D_2_Negativicutes.D_3_Selenomonadales.D_4_Veillonellaceae.D_5_Veillonella                      | 0,79    | 0,05         |
| D_0_Bacteria.D_1_Fusobacteria.D_2_Fusobacteriia.D_3_Fusobacteriales.D_4_Fusobacteriaceae.D_5_Fusobacterium                 | 0,76    | -0,06        |
| D_0_Bacteria.D_1_Fusobacteria.D_2_Fusobacteriia.D_3_Fusobacteriales.D_4_Leptotrichiaceae.D_5_Leptotrichia                  | 0,99    | 0,00         |
| D_0_Bacteria.D_1_Patescibacteria.D_2_Saccharimonadia.D_3_Saccharimonadales.D_4_Saccharimonadaceae.D_5_uncultured.bacterium | 0,94    | 0,02         |
| D_0_Bacteria.D_1_Proteobacteria.D_2_Gammaproteobacteria.D_3_Betaproteobacteriales.D_4_Neisseriaceae.D_5_Neisseria          | 0,60    | 0,10         |
| D_0_Bacteria.D_1_Proteobacteria.D_2_Gammaproteobacteria.D_3_Pasteurellales.D_4_Pasteurellaceae.D_5_Haemophilus             | 0,54    | -0,12        |

**Table S4: Correlation between genera relative abundance at preconditioning and ulcerative oral mucositis (OM) grade.** All OM grades (0-4) are considered in this analysis. Spearman correlation was used.

| Genus                                                                                                                      | P-value | Spearman rho |
|----------------------------------------------------------------------------------------------------------------------------|---------|--------------|
| D_0_Bacteria.D_1_Actinobacteria.D_2_Actinobacteria.D_3_Actinomycetales.D_4_Actinomycetaceae.D_5_Actinomyces                | 0,69    | 0,12         |
| D_0_Bacteria.D_1_Actinobacteria.D_2_Actinobacteria.D_3_Micrococcales.D_4_Micrococcaceae.D_5_Rothia                         | 0,67    | -0,13        |
| D_0_Bacteria.D_1_Actinobacteria.D_2_Coriobacteriia.D_3_Coriobacteriales.D_4_Atopobiaceae.D_5_Atopobium                     | 0,89    | -0,04        |
| D_0_Bacteria.D_1_Bacteroidetes.D_2_Bacteroidia.D_3_Bacteroidales.D_4_Porphyrromonadaceae.D_5_Porphyrromonas                | 0,03    | 0,61         |
| D_0_Bacteria.D_1_Bacteroidetes.D_2_Bacteroidia.D_3_Bacteroidales.D_4_Prevotellaceae.D_5_Alloprevotella                     | 0,07    | 0,51         |
| D_0_Bacteria.D_1_Bacteroidetes.D_2_Bacteroidia.D_3_Bacteroidales.D_4_Prevotellaceae.D_5_Prevotella                         | 0,59    | 0,17         |
| D_0_Bacteria.D_1_Bacteroidetes.D_2_Bacteroidia.D_3_Bacteroidales.D_4_Prevotellaceae.D_5_Prevotella.6                       | 0,66    | -0,14        |
| D_0_Bacteria.D_1_Bacteroidetes.D_2_Bacteroidia.D_3_Bacteroidales.D_4_Prevotellaceae.D_5_Prevotella.7                       | 0,47    | -0,22        |
| D_0_Bacteria.D_1_Bacteroidetes.D_2_Bacteroidia.D_3_Flavobacteriales.D_4_Flavobacteriaceae.D_5_Capnocytophaga               | 0,46    | 0,22         |
| D_0_Bacteria.D_1_Bacteroidetes.D_2_Bacteroidia.D_3_Flavobacteriales.D_4_Weeksellaceae.D_5_Bergeyella                       | 0,22    | 0,37         |
| D_0_Bacteria.D_1_Epsilonbacteraeota.D_2_Campylobacteria.D_3_Campylobacteriales.D_4_Campylobacteraceae.D_5_Campylobacter    | 0,37    | -0,27        |
| D_0_Bacteria.D_1_Firmicutes.D_2_Bacilli.D_3_Bacillales.D_4_Family.XI.D_5_Gemella                                           | 0,82    | -0,07        |
| D_0_Bacteria.D_1_Firmicutes.D_2_Bacilli.D_3_Lactobacillales.D_4_Carnobacteriaceae.D_5_Granulicatella                       | 0,44    | 0,23         |
| D_0_Bacteria.D_1_Firmicutes.D_2_Bacilli.D_3_Lactobacillales.D_4_Lactobacillaceae.D_5_Lactobacillus                         | 0,31    | -0,31        |
| D_0_Bacteria.D_1_Firmicutes.D_2_Bacilli.D_3_Lactobacillales.D_4_Streptococcaceae.D_5_Streptococcus                         | 0,52    | -0,20        |
| D_0_Bacteria.D_1_Firmicutes.D_2_Clostridia.D_3_Clostridiales.D_4_Lachnospiraceae.D_5_Catonella                             | 0,65    | -0,14        |
| D_0_Bacteria.D_1_Firmicutes.D_2_Clostridia.D_3_Clostridiales.D_4_Lachnospiraceae.D_5_Lachnoanaerobaculum                   | 0,40    | -0,26        |
| D_0_Bacteria.D_1_Firmicutes.D_2_Clostridia.D_3_Clostridiales.D_4_Lachnospiraceae.D_5_Oribacterium                          | 0,47    | 0,22         |
| D_0_Bacteria.D_1_Firmicutes.D_2_Clostridia.D_3_Clostridiales.D_4_Lachnospiraceae.D_5_Stomatobaculum                        | 0,67    | 0,13         |
| D_0_Bacteria.D_1_Firmicutes.D_2_Erysipelotrichia.D_3_Erysipelotrichales.D_4_Erysipelotrichaceae.D_5_Solobacterium          | 0,35    | 0,29         |
| D_0_Bacteria.D_1_Firmicutes.D_2_Negativicutes.D_3_Selenomonadales.D_4_Veillonellaceae.D_5_Megasphaera                      | 0,26    | -0,34        |
| D_0_Bacteria.D_1_Firmicutes.D_2_Negativicutes.D_3_Selenomonadales.D_4_Veillonellaceae.D_5_Selenomonas.3                    | 0,20    | -0,38        |
| D_0_Bacteria.D_1_Firmicutes.D_2_Negativicutes.D_3_Selenomonadales.D_4_Veillonellaceae.D_5_Veillonella                      | 0,21    | -0,37        |
| D_0_Bacteria.D_1_Fusobacteria.D_2_Fusobacteriia.D_3_Fusobacteriales.D_4_Fusobacteriaceae.D_5_Fusobacterium                 | 0,67    | 0,13         |
| D_0_Bacteria.D_1_Fusobacteria.D_2_Fusobacteriia.D_3_Fusobacteriales.D_4_Leptotrichiaceae.D_5_Leptotrichia                  | 0,51    | -0,20        |
| D_0_Bacteria.D_1_Patescibacteria.D_2_Saccharimonadia.D_3_Saccharimonadales.D_4_Saccharimonadaceae.D_5_uncultured.bacterium | 0,95    | -0,02        |
| D_0_Bacteria.D_1_Proteobacteria.D_2_Gammaproteobacteria.D_3_Betaproteobacteriales.D_4_Neisseriaceae.D_5_Neisseria          | 0,19    | 0,39         |
| D_0_Bacteria.D_1_Proteobacteria.D_2_Gammaproteobacteria.D_3_Pasteurellales.D_4_Pasteurellaceae.D_5_Haemophilus             | 0,23    | -0,35        |

**Table S5: Correlation between genera relative abundance at preconditioning and ulcerative oral mucositis (OM) grade.** Only ulcerative OM grades (2-4) are considered in this analysis. Spearman correlation was used.

| Genus                                                                                                                   | P-value | HR   | HR (2.5 percentile) | HR (97.5 percentile) |
|-------------------------------------------------------------------------------------------------------------------------|---------|------|---------------------|----------------------|
| D_0_Bacteria.D_1_Actinobacteria.D_2_Actinobacteria.D_3_Actinomycetales.D_4_Actinomycetaceae.D_5_Actinomyces             | 0,42    | 1,59 | 0,51                | 5,01                 |
| D_0_Bacteria.D_1_Actinobacteria.D_2_Actinobacteria.D_3_Bifidobacteriales.D_4_Bifidobacteriaceae.                        | 0,16    | 2,47 | 0,67                | 9,01                 |
| D_0_Bacteria.D_1_Actinobacteria.D_2_Actinobacteria.D_3_Micrococcales.D_4_Micrococcaceae.D_5_Rothia                      | 0,94    | 1,04 | 0,33                | 3,34                 |
| D_0_Bacteria.D_1_Actinobacteria.D_2_Coriobacteriia.D_3_Coriobacteriales.D_4_Atopobiaceae.D_5_Atopobium                  | 0,95    | 1,04 | 0,33                | 3,25                 |
| D_0_Bacteria.D_1_Bacteroidetes.D_2_Bacteroidia.D_3_Bacteroidales.D_4_Porphyrromonadaceae.D_5_Porphyrromonas             | 0,07    | 0,3  | 0,08                | 1,2                  |
| D_0_Bacteria.D_1_Bacteroidetes.D_2_Bacteroidia.D_3_Bacteroidales.D_4_Prevotellaceae.D_5_Alloprevotella                  | 0,86    | 1,1  | 0,35                | 3,45                 |
| D_0_Bacteria.D_1_Bacteroidetes.D_2_Bacteroidia.D_3_Bacteroidales.D_4_Prevotellaceae.D_5_Prevotella                      | 0,88    | 1,09 | 0,35                | 3,43                 |
| D_0_Bacteria.D_1_Bacteroidetes.D_2_Bacteroidia.D_3_Bacteroidales.D_4_Prevotellaceae.D_5_Prevotella.6                    | 0,28    | 2,03 | 0,54                | 7,55                 |
| D_0_Bacteria.D_1_Bacteroidetes.D_2_Bacteroidia.D_3_Bacteroidales.D_4_Prevotellaceae.D_5_Prevotella.7                    | 0,77    | 0,84 | 0,27                | 2,66                 |
| D_0_Bacteria.D_1_Bacteroidetes.D_2_Bacteroidia.D_3_Flavobacteriales.D_4_Flavobacteriaceae.D_5_Capnocytophaga            | 0,84    | 0,89 | 0,28                | 2,81                 |
| D_0_Bacteria.D_1_Epsilonbacteraeota.D_2_Campylobacteria.D_3_Campylobacteriales.D_4_Campylobacteraceae.D_5_Campylobacter | 0,98    | 0,99 | 0,32                | 3,08                 |
| D_0_Bacteria.D_1_Firmicutes.D_2_Bacilli.D_3_Bacillales.D_4_Family.XI.D_5_Gemella                                        | 0,08    | 0,3  | 0,08                | 1,24                 |
| D_0_Bacteria.D_1_Firmicutes.D_2_Bacilli.D_3_Lactobacillales.D_4_Carnobacteriaceae.D_5_Granulicatella                    | 0,96    | 1,03 | 0,33                | 3,23                 |
| D_0_Bacteria.D_1_Firmicutes.D_2_Bacilli.D_3_Lactobacillales.D_4_Lactobacillaceae.D_5_Lactobacillus                      | 0,04    | 4,99 | 0,96                | 26,04                |
| D_0_Bacteria.D_1_Firmicutes.D_2_Bacilli.D_3_Lactobacillales.D_4_Streptococcaceae.D_5_Streptococcus                      | 0,15    | 0,4  | 0,11                | 1,42                 |
| D_0_Bacteria.D_1_Firmicutes.D_2_Clostridia.D_3_Clostridiales.D_4_Lachnospiraceae.D_5_Lachnoanaerobaculum                | 0,16    | 0,38 | 0,1                 | 1,51                 |
| D_0_Bacteria.D_1_Firmicutes.D_2_Clostridia.D_3_Clostridiales.D_4_Lachnospiraceae.D_5_Oribacterium                       | 0,91    | 1,07 | 0,34                | 3,35                 |
| D_0_Bacteria.D_1_Firmicutes.D_2_Negativicutes.D_3_Selenomonadales.D_4_Veillonellaceae.D_5_Selenomonas.3                 | 0,16    | 2,47 | 0,67                | 9,01                 |
| D_0_Bacteria.D_1_Firmicutes.D_2_Negativicutes.D_3_Selenomonadales.D_4_Veillonellaceae.D_5_Veillonella                   | 0,10    | 0,33 | 0,08                | 1,3                  |
| D_0_Bacteria.D_1_Fusobacteria.D_2_Fusobacteriia.D_3_Fusobacteriales.D_4_Fusobacteriaceae.D_5_Fusobacterium              | 0,39    | 0,6  | 0,19                | 1,92                 |
| D_0_Bacteria.D_1_Fusobacteria.D_2_Fusobacteriia.D_3_Fusobacteriales.D_4_Leptotrichiaceae.D_5_Leptotrichia               | 0,97    | 1,02 | 0,33                | 3,2                  |

**Table S6: Association between genera relative abundance at oral mucositis (OM) onset and time to OM healing.** Groups were stratified based on median genus relative abundance and association with time to OM healing was assessed by estimating the Cox proportional hazards between groups. HR, Hazard Ratio.
